# Supplementary material for: E-Cadherin-Deficient Cells Are Sensitive to the Multikinase Inhibitor Dasatinib
Source: MDPI journal article supplement (doi:10.3390/cancers14071609), 2022-03-22
Supplement: s1 [file s1]

# E-Cadherin-Deficient Cells Are Sensitive to the Multikinase Inhibitor Dasatinib

Nicola Bougen-Zhukov, Lyvianne Decourtye-Espiard, Wilson Mitchell, Kieran Redpath, Jacqui Perkinson, Tanis Godwin, Michael A. Black and Parry Guilford

Centre for Translational Cancer Research (Te Aho Matatū), Cancer Genetics Laboratory, Department of Biochemistry, University of Otago, Dunedin 9016, New Zealand; nicola.bougen-zhukov@otago.ac.nz (N.B.-Z.); lyvianne.decourtye@otago.ac.nz (L.D.-E.); mitwi509@student.otago.ac.nz (W.M.); redki406@student.otago.ac.nz (K.R.); jacquiperkinson96@gmail.com (J.P.); tanis.godwin@otago.ac.nz (T.G.); mik.black@otago.ac.nz (M.A.B.)  
\* Correspondence: parry.guilford@otago.ac.nz; Tel.: +64-3-479-7673

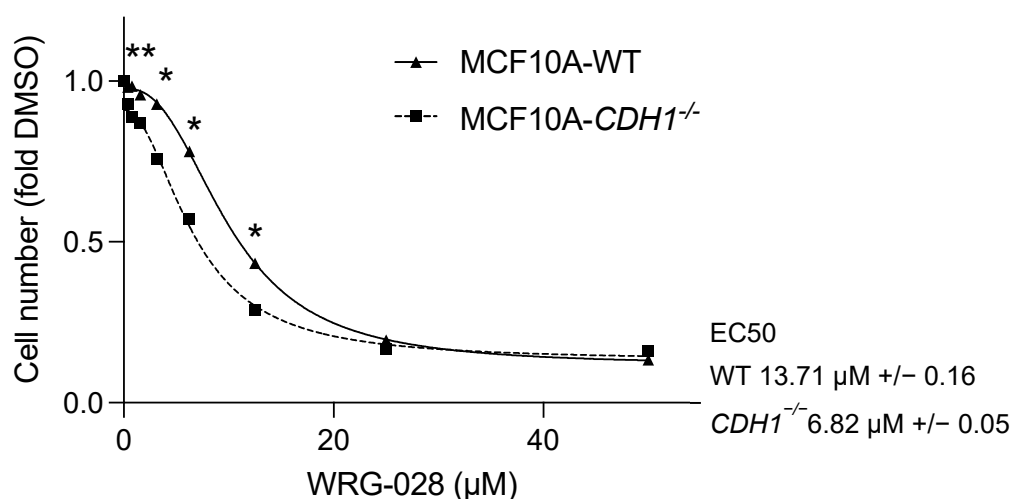

**Figure S1.** Treatment with the DDR2 inhibitor WRG-028 is synthetic lethal in E-cadherin deficient mammary epithelial cells. (For all graphs, error bars = SEM; \*  $p < 0.05$ , \*\*  $p < 0.01$ ;  $n \geq 3$  independent biological replicates; unpaired two-sided  $t$ -test.).

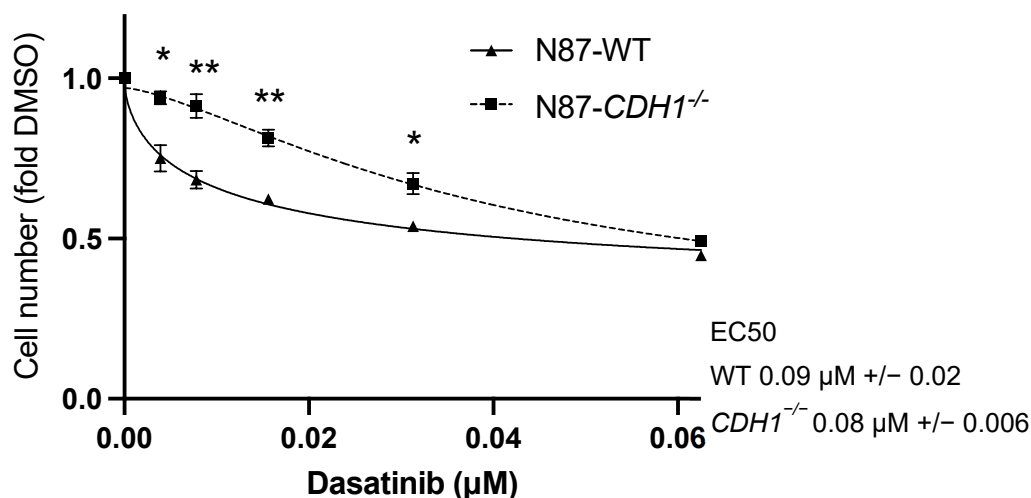

**Figure S2.** N87 gastric cells lacking  $CDH1$  are less sensitive to dasatinib than WT cells. (For all graphs, error bars = SEM; \*  $p < 0.05$ , \*\*  $p < 0.01$ ;  $n \geq 3$  independent biological replicates; unpaired two-sided  $t$ -test.).

### A. Gastric organoids: MK2206 treatment

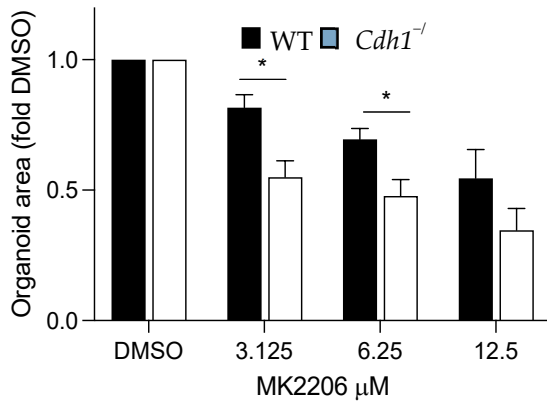

*Gastric EC50s*

WT 29.58  $\mu$ M  $\pm$  14.11

*Cdh1*<sup>-/-</sup> 7.96  $\mu$ M  $\pm$  4.08

### B. Mammary organoids: MK2206 treatment

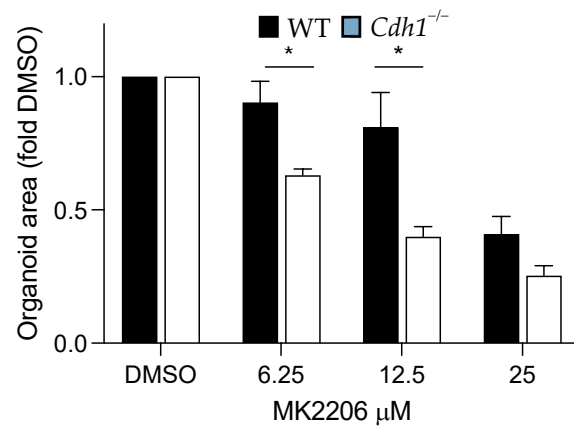

*Mammary EC50s*

WT 21.26  $\mu$ M  $\pm$  2.13

*Cdh1*<sup>-/-</sup> 9.46  $\mu$ M  $\pm$  0.049

### C. Gastric organoids: ARQ-092 treatment

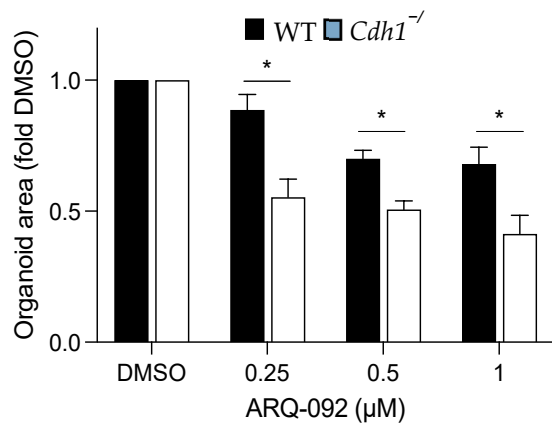

*Gastric EC50s*

WT 1.6  $\mu$ M  $\pm$  0.2

*Cdh1*<sup>-/-</sup> 0.7  $\mu$ M  $\pm$  0.4

### D. Mammary organoids: ARQ-092 treatment

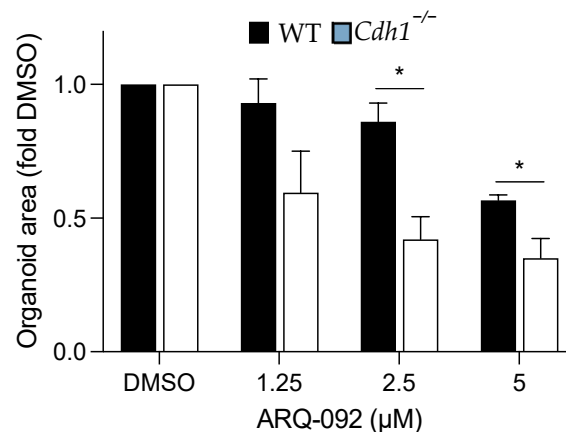

*Mammary EC50s*

WT 5.9  $\mu$ M  $\pm$  0.4

*Cdh1*<sup>-/-</sup> 1.7  $\mu$ M  $\pm$  1.1

**Figure S3.** Mouse derived organoids containing *Cdh1*<sup>-/-</sup> cells are more sensitive to the growth inhibiting effects of allosteric AKT inhibitors. Bar graphs showing relative area of DMSO or MK2206 treated gastric (A) or mammary (B) organoids. Bar graphs showing relative area of DMSO or ARQ-092 treated gastric (C) or mammary (D) organoids. (For all graphs, error bars = SEM; \*  $p$  < 0.05;  $n \geq 3$  independent biological replicates; unpaired two-sided  $t$ -test.).

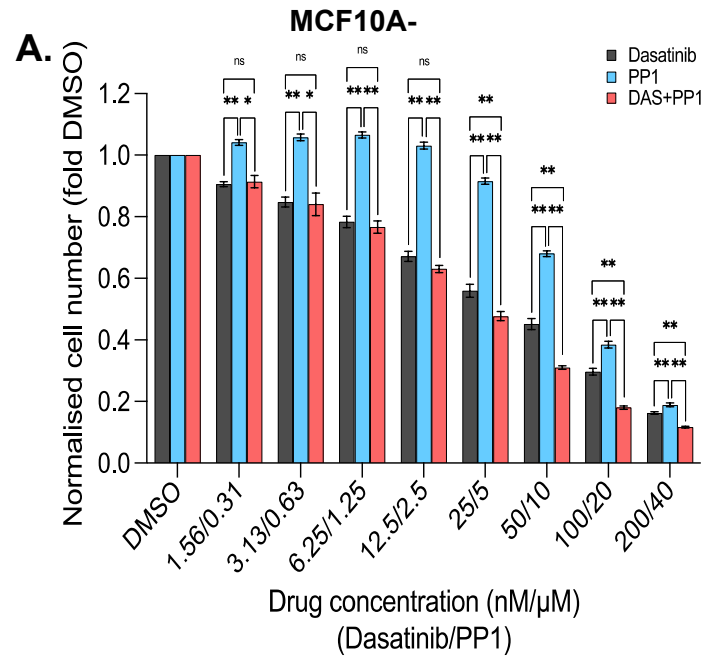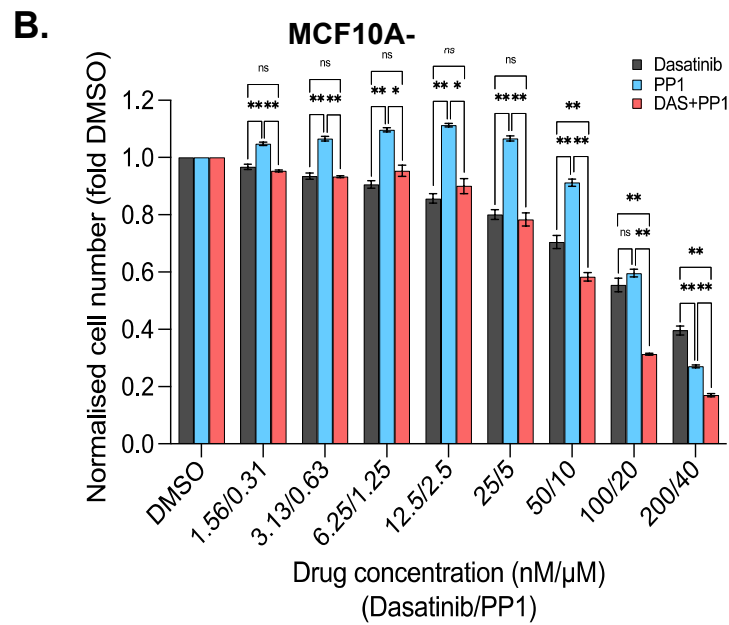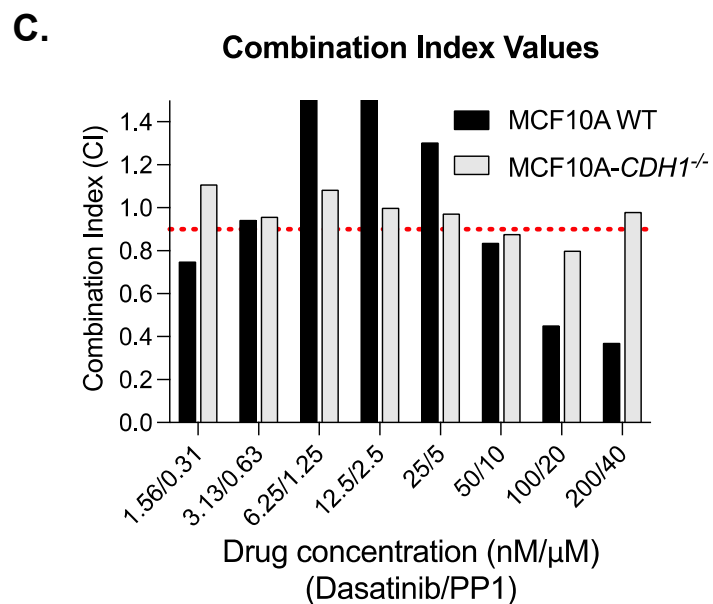

**Figure S4.** Combining dasatinib with the SRC inhibitor PP1 is synergistic in MCF10A cells at higher concentrations. Normalised MCF10A-WT (A) and *CDH1*<sup>-/-</sup> (B) cell counts 48 h after treatment with serial dilutions of dasatinib, PP1 or a combination of dasatinib and PP1. X axis label, dasatinib concentration (nM)/PP1 concentration (μM). (C) Combination index (CI) values for MCF10a-WT and *CDH1*<sup>-/-</sup> cells treated with combination of dasatinib and PP1. Values below 0.9 indicate the drug combination is synergistic at that concentration. (For all graphs, error bars = SEM; ns:  $p > 0.05$ , \*  $p < 0.05$ , \*\*  $p < 0.01$ ;  $n \geq 3$  independent biological replicates; unpaired two-sided t-test.).

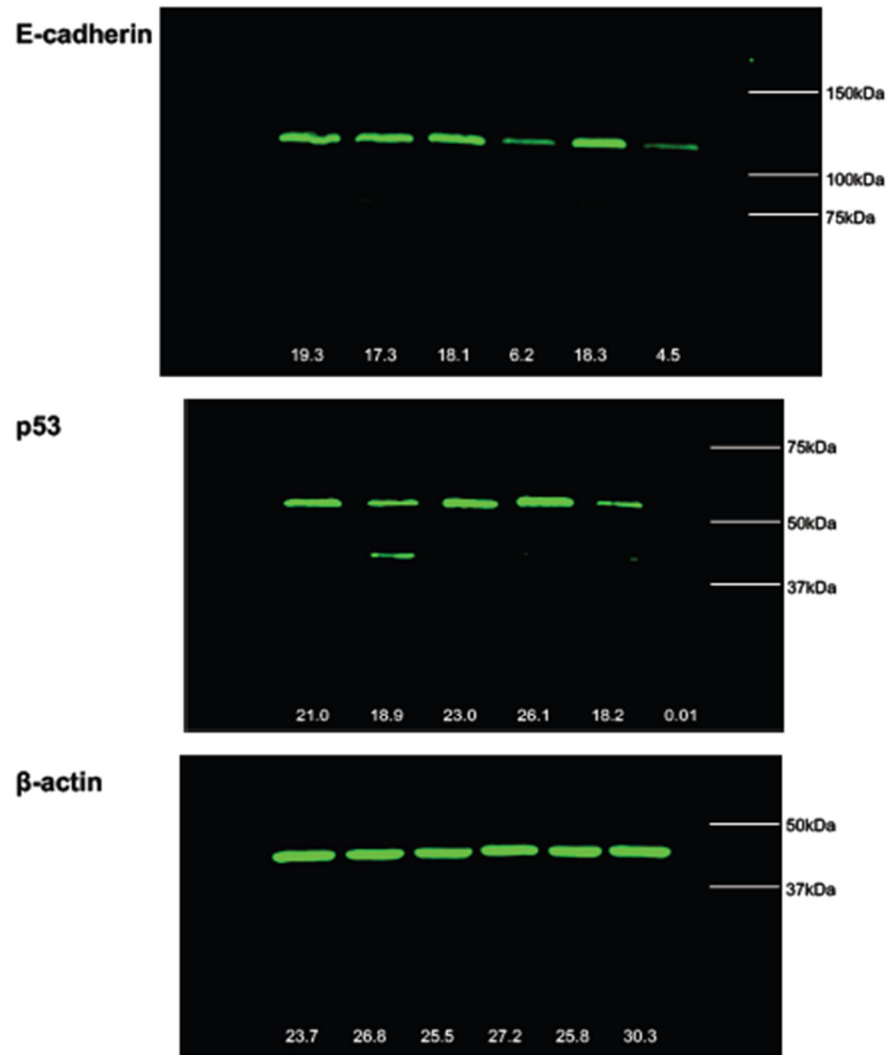

**Figure S5.** Uncropped western blots: mammary organoid induction test.

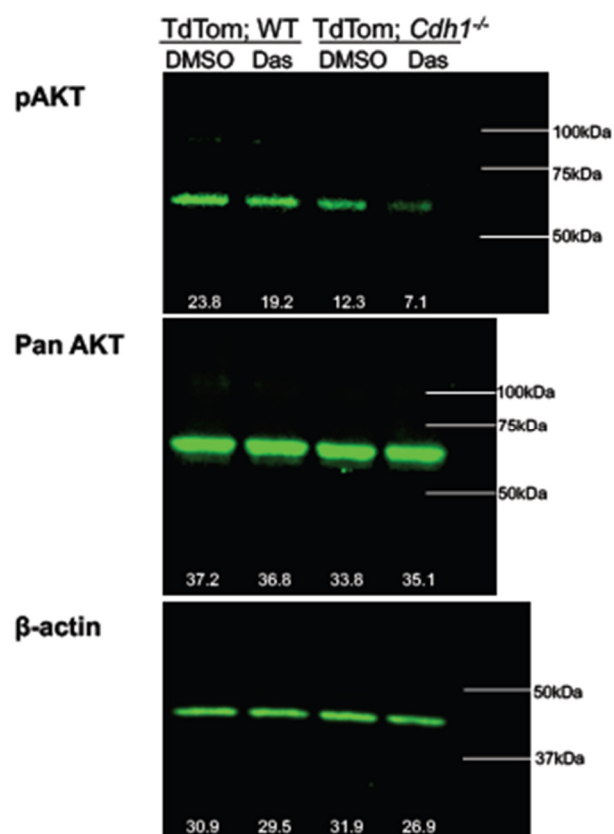

Figure S6. Uncropped western blots: gastric organoids +/- dasatinib.

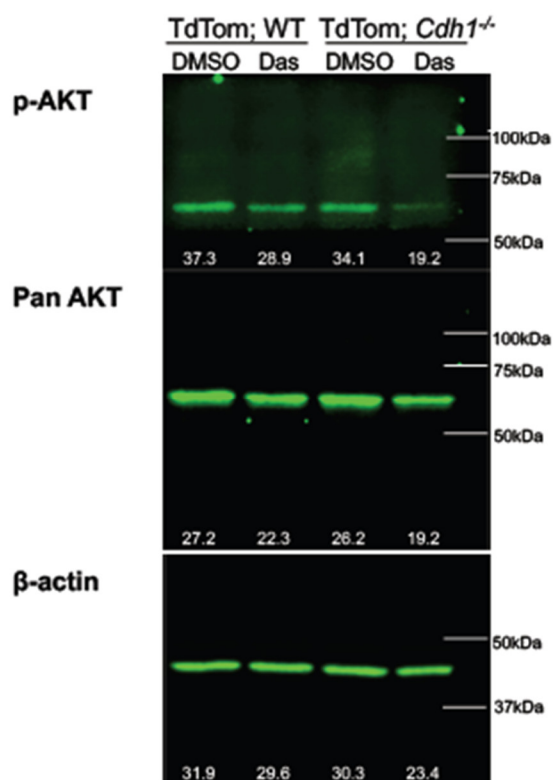

Figure S7. Uncropped western blots: mammary organoids +/- dasatinib.

**Table S1.** Organoid media components.

| Reagent                     | Mammary organoid media final concentration | Gastric organoid media final concentration | Reagent ordering information |
|-----------------------------|--------------------------------------------|--------------------------------------------|------------------------------|
| Advanced DMEM/F12           | N/A                                        | N/A                                        | Life Technologies, #1864109  |
| Pen/Strep                   | 1x                                         | 1x                                         | Life Technologies, #15140148 |
| Glutamax                    | 2 mM                                       | 2 mM                                       | Life Technologies, #35050061 |
| Hepes                       | 10 mM                                      | 10 mM                                      | Thermo Fisher, #15630080     |
| B27                         | 1x                                         | 1x                                         | Thermo Fisher, #17504044     |
| N-Acetyl-L-cysteine         | 1.25                                       | 1 mM                                       | Sigma Aldrich, #A9165        |
| EGF                         | 50 ng/mL                                   | 50 ng/mL                                   | Sigma Aldrich, #E9644        |
| FGF10                       | 10 ng/mL                                   | 100 ng/mL                                  | Life Technologies, #PHG0204  |
| A-83-01                     | 1 uM                                       | 2 uM                                       | Cayman Chemical, #9001799    |
| Y-27632 dihydrochloride     | 5 uM                                       | 10 uM                                      | Sigma Aldrich, #Y0503        |
| Wnt3a conditioned media     | 2.50%                                      | 50%                                        | From Hub-Wnt3A cells         |
| R-spondin conditioned media | 0.50%                                      | 10%                                        | From 293T-HA-Rspo1-Fc cells  |
| Noggin conditioned media    |                                            | 10%                                        | From Hek293-mNoggin-Fc cells |
| N2                          |                                            | 1x                                         | Thermo Fisher, #17502048     |
| Gastrin I                   |                                            | 10 nM                                      | Sigma Aldrich, #G9145        |
| Insulin                     | 5 ug/mL                                    |                                            | Sigma Aldrich, #I0516        |
| Hydrocortisone              | 100 ng/mL                                  |                                            | Sigma Aldrich, #H0888        |
| FGF2                        | 5 ng/mL                                    |                                            | Peptotech, #450-33           |

**Table S2.** Genes that were associated with both *AKT1* and *AKT3*. These were removed from the analysis before drug target selection to avoid selecting compounds that target both *CDH1*<sup>+</sup> and *CDH1*-gastric cancers (as there is no correlation between *AKT1* and *CDH1* status).

| Genes Associated with AKT3 and AKT1 |
|-------------------------------------|
| FBN1                                |
| A2M                                 |
| COL14A1                             |
| FERMT2                              |
| ANTXR1                              |
| TMEM47                              |
| ZEB1                                |
| RAB31                               |
| FRMD6                               |
| SPARCL1                             |
| DCN                                 |
| GNB4                                |
| CYBRD1                              |
| RSPO3                               |
| AKAP12                              |
| CYP1B1                              |
| PRRX1                               |
| VCAN                                |
| MGP                                 |
| EFEMP1                              |
| OGN                                 |
| CFH                                 |
| PHLDB2                              |

---

ABI3BP  
SPON1  
CTSK  
CXCL12  
C7  
GPNMB  
FGL2  
ABCA8  
PI15  
CPA3

---

**Table S3.** The 51 significantly *AKT3* associated genes with a fold change in expression >2 between high and low *AKT3* expressing samples in both the GEO and TCGA datasets. Fold change in expression and Benjamini-Hochberg-adjusted p-value in each dataset are shown for each gene. Genes are sorted based on the average of ranks assigned to the Benjamini-Hochberg-adjusted *p*-values in each dataset (not shown).

|          | TCGA FC | GEO FC | TCGA Adj <i>p</i> -Value | GEO Adj <i>p</i> -Value |
|----------|---------|--------|--------------------------|-------------------------|
| DDR2     | 5.13    | 2.04   | 6.84E-51                 | 2.89E-35                |
| CDH11    | 3.14    | 2.33   | 1.99E-43                 | 1.26E-31                |
| AOC3     | 4.65    | 2.45   | 2.91E-43                 | 1.57E-30                |
| MSRB3    | 4.12    | 2.06   | 9.74E-43                 | 6.82E-30                |
| FSTL1    | 2.61    | 2.07   | 9.96E-43                 | 4.76E-29                |
| DPYSL3   | 4.28    | 2.07   | 4.95E-42                 | 1.46E-28                |
| COL8A1   | 5.33    | 2.02   | 8.41E-42                 | 9.60E-28                |
| TIMP3    | 3.16    | 2.16   | 9.55E-40                 | 1.96E-27                |
| CCDC80   | 5.29    | 2.28   | 9.89E-39                 | 5.48E-27                |
| LTBP1    | 3.00    | 2.10   | 1.54E-38                 | 4.74E-26                |
| PDLIM3   | 4.40    | 2.50   | 2.10E-38                 | 1.85E-25                |
| C1S      | 2.87    | 2.37   | 3.61E-36                 | 2.66E-25                |
| GREM1    | 6.27    | 2.35   | 9.83E-36                 | 3.64E-25                |
| GLT8D2   | 2.78    | 2.18   | 2.28E-35                 | 1.88E-24                |
| GAS1     | 5.25    | 3.11   | 2.37E-35                 | 2.77E-24                |
| TNS1     | 3.67    | 2.35   | 5.32E-35                 | 5.75E-24                |
| KCNMA1   | 7.31    | 3.77   | 3.20E-34                 | 1.16E-23                |
| MYLK     | 4.59    | 2.61   | 3.98E-34                 | 1.31E-23                |
| C1R      | 2.76    | 2.14   | 6.15E-34                 | 2.33E-23                |
| ADAMTS1  | 2.75    | 2.08   | 1.82E-33                 | 3.75E-23                |
| COL6A3   | 2.67    | 2.01   | 1.19E-32                 | 4.89E-23                |
| PLN      | 6.78    | 2.05   | 1.39E-32                 | 1.01E-22                |
| CALD1    | 3.09    | 2.71   | 1.49E-32                 | 1.55E-22                |
| FNDC1    | 6.00    | 2.79   | 4.85E-32                 | 1.81E-22                |
| IGFBP5   | 3.01    | 2.49   | 7.49E-32                 | 6.52E-22                |
| VIM      | 2.08    | 2.30   | 1.68E-31                 | 2.83E-21                |
| FHL1     | 4.38    | 2.30   | 7.42E-31                 | 5.52E-21                |
| SYNPO2   | 7.38    | 2.65   | 9.73E-31                 | 5.91E-21                |
| ACTA2    | 3.36    | 2.10   | 1.43E-30                 | 9.50E-21                |
| ASPN     | 3.96    | 2.49   | 2.41E-30                 | 1.82E-20                |
| SERPINF1 | 2.92    | 2.45   | 3.15E-30                 | 4.59E-20                |
| TAGLN    | 4.09    | 2.63   | 8.38E-29                 | 1.34E-18                |
| COL15A1  | 2.38    | 2.06   | 3.37E-28                 | 3.06E-18                |
| SDC2     | 2.13    | 2.54   | 4.76E-28                 | 1.21E-17                |
| SULF1    | 3.36    | 2.13   | 4.96E-28                 | 2.28E-17                |
| MMP2     | 2.70    | 3.14   | 1.85E-27                 | 4.33E-17                |
| MYH11    | 8.70    | 2.28   | 2.89E-27                 | 4.98E-17                |
| TNC      | 3.57    | 2.48   | 8.26E-27                 | 6.60E-17                |
| FN1      | 3.20    | 2.28   | 2.73E-26                 | 1.23E-16                |
| SFRP4    | 7.87    | 2.49   | 3.86E-26                 | 7.99E-16                |
| THBS2    | 3.68    | 2.07   | 9.61E-26                 | 1.63E-15                |

---

|        |      |      |          |          |
|--------|------|------|----------|----------|
| CNN1   | 6.75 | 2.15 | 2.87E-25 | 1.18E-14 |
| SFRP2  | 9.10 | 2.04 | 6.17E-25 | 2.56E-14 |
| CAV1   | 2.46 | 2.24 | 2.18E-23 | 6.84E-13 |
| SYNM   | 5.74 | 2.69 | 1.51E-22 | 1.08E-12 |
| FBLN1  | 3.69 | 2.12 | 2.27E-22 | 1.18E-12 |
| ACTG2  | 6.18 | 2.67 | 2.54E-20 | 2.17E-12 |
| POSTN  | 2.33 | 2.17 | 1.95E-16 | 3.90E-12 |
| NNMT   | 2.16 | 2.43 | 6.04E-16 | 1.79E-11 |
| CTHRC1 | 2.27 | 2.12 | 8.32E-15 | 7.70E-10 |
| CCL11  | 2.21 | 2.08 | 1.53E-08 | 4.04E-08 |

---
